# Supplementary material
Source: ML conference proceedings conference paper supplement (https://proceedings.neurips.cc/paper_files/paper/2014/hash/b147a61c1d07c1c999560f62add6dbc7-Abstract.html)
Supplement: Supplementary file [file b147a61c1d07c1c999560f62add6dbc7-Supplemental.zip]

---

# Appendix for Large-Margin Convex Polytope Machine

---

Alex Kantchelian   Michael Carl Tschantz   Ling Huang<sup>†</sup>  
 Peter L. Bartlett   Anthony D. Joseph   J. D. Tygar

UC Berkeley – {akant|mct|bartlett|adj|tygar}@cs.berkeley.edu

<sup>†</sup>Datavisor – ling.huang@datavisor.com

## 1 Details of Maximizing the Margin

We now turn to the question of maximizing the margin. We show the step-by-step derivation a smoothed but non-convex optimization problem for maximizing the total margin.

$$\begin{aligned} \max_{\mathbf{W}} \delta_{\mathbf{W}}^T \\ \|\mathbf{W}_1\| = \dots = \|\mathbf{W}_K\| = 1 \end{aligned} \tag{1}$$

Introducing one additional variable  $\zeta_k$  per classifier, problem (1) is equivalent to:

$$\begin{aligned} \max_{\mathbf{W}, \zeta} \sum_{k=1}^K \zeta_k \\ \forall i, \zeta_{z(\mathbf{x}^i)} \leq y^i \mathbf{W}_{z(\mathbf{x}^i)} \mathbf{x}^i \\ \zeta_1 > 0, \dots, \zeta_K > 0 \\ \|\mathbf{W}_1\| = \dots = \|\mathbf{W}_K\| = 1 \end{aligned} \tag{2}$$

Considering the unnormalized rows  $\mathbf{W}_k/\zeta_k$ , we obtain the following equivalent formulation:

$$\max_{\mathbf{W}} \sum_{k=1}^K \frac{1}{\|\mathbf{W}_k\|} \tag{3}$$

$$\forall i, 1 \leq y^i \mathbf{W}_{z(\mathbf{x}^i)} \mathbf{x}^i \tag{4}$$

When  $y = -1$ ,  $z(\mathbf{x}^i)$  satisfying the margin constraint (4) implies that the constraint holds for every sub-classifier  $k$  since  $y^i \mathbf{W}_k \mathbf{x}^i$  is minimal at  $k = z(\mathbf{x}^i)$ . Thus, when  $y = -1$ , we can enforce the constraint for all  $k$  yielding the following equivalent problem:

$$\begin{aligned} \max_{\mathbf{W}} \sum_{k=1}^K \frac{1}{\|\mathbf{W}_k\|} \\ \forall i : y^i = -1, \forall k \in \{1, \dots, K\}, 1 + \mathbf{W}_k \mathbf{x}^i \leq 0 \\ \forall i : y^i = +1, 1 - \mathbf{W}_{z(\mathbf{x}^i)} \mathbf{x}^i \leq 0 \end{aligned} \tag{5}$$

Finally, we can relax the objective into a convex one by minimizing the sum of the inverse squares of the terms instead of maximizing the sum of the terms. We obtain the following smoothed problem:

$$\min_{\mathbf{W}} \sum_{k=1}^K \|\mathbf{W}_k\|^2 \quad (6)$$

$$\forall i : y^i = -1, \forall k \in \{1, \dots, K\}, 1 + \mathbf{W}_k \mathbf{x}^i \leq 0 \quad (7)$$

$$\forall i : y^i = +1, 1 - \mathbf{W}_{z(\mathbf{x}^i)} \mathbf{x}^i \leq 0 \quad (8)$$

The objective (6) is now the familiar convex  $L_2$  regularization term  $\|\mathbf{W}\|^2$ . The negative samples constraints (7) are convex (linear functions), but the positive terms (8) result in non-convex constraints because of the instance-dependent assignment  $z$ . As for the Support Vector Machine, we can introduce  $n$  slack variables  $\xi_i$  and a regularization factor  $C > 0$  for the common case of noisy, non-separable data. Hence, the practical problem becomes:

$$\begin{aligned} \min_{\mathbf{W}, \xi} \quad & \|\mathbf{W}\|^2 + C \sum_{i=1}^n \xi_i \\ \forall i : \quad & y^i = -1, \forall k \in \{1, \dots, K\}, 1 + \mathbf{W}_k \mathbf{x}^i \leq \xi_i \\ \forall i : \quad & y^i = +1, 1 - \mathbf{W}_{z(\mathbf{x}^i)} \mathbf{x}^i \leq \xi_i \\ \forall i, \quad & \xi_i \geq 0 \end{aligned} \quad (9)$$

Following the same steps, we obtain the following problem for maximizing the worst-case margin. The only difference is the regularization term in the objective function which becomes  $\max_k \|\mathbf{W}_k\|^2$  instead of  $\|\mathbf{W}\|^2$ .

## 2 Proof of Theorem 1

The Rademacher complexity of  $F_{K,B}$  is defined as

$$R_n(F_{K,B}) = \mathbb{E}_{\mathbf{x}} \mathbb{E}_{\epsilon} \left[ \sup_{f \in F_{K,B}} \left| \frac{1}{n} \sum_i \epsilon_i f(\mathbf{x}_i) \right| \right]$$

Where the  $\epsilon_i$  are  $\pm 1$  i.i.d. Bernoulli with probability 1/2. It is also possible to define the Gaussian Rademacher complexity of  $F_{K,B}$  is as:

$$G_n(F_{K,B}) = \mathbb{E}_{\mathbf{x}} \mathbb{E}_g \left[ \sup_{f \in F_{K,B}} \left| \frac{1}{n} \sum_i g_i f(\mathbf{x}_i) \right| \right]$$

where the  $g_i$ s are i.i.d. standard normal variables.

By Lemma 4 in [1], there exists an absolute constant  $c$  such that for every  $F_{K,B}$  and  $n$  we have  $R_n(F_{K,B}) \leq c G_n(F_{K,B})$ . Thus, we can provide a bound on the Gaussian Rademacher complexity. In our case, this can be directly done by invoking Theorem 14 of [1]. Indeed,  $a_1, \dots, a_k \mapsto \max(a_1, \dots, a_k)$  is a Lipchitz with constant 1, thus  $F_{K,B}$  can be viewed as the composition of the  $\max$  function with the real valued classes of linear separators  $F_i$  that are such that

$$F_i = \{\mathbf{x} \mapsto \langle \mathbf{W}, \mathbf{x} \rangle \mid \|\mathbf{W}\| \leq B_i\}$$

So we have that  $G_n(F_{K,B}) \leq 2 \sum_{k=1}^K G_n(F_k)$ . The Gaussian Rademacher complexities of each of these  $F_k$ s is bounded by  $B_k/\sqrt{n}$  by a standard argument as follows:

$$\begin{aligned}
G_n(F_k) &= \mathbb{E}_{\mathbf{x}} \mathbb{E}_g \left[ \sup_{\|\mathbf{W}\| \leq B_k} \left| \frac{1}{n} \sum_i g_i \langle \mathbf{W}, \mathbf{x}_i \rangle \right| \right] \\
&= \mathbb{E}_{\mathbf{x}} \mathbb{E}_g \left[ \sup_{\|\mathbf{W}\| \leq B_k} \frac{1}{n} \langle \mathbf{W}, \sum_{i=1}^n \mathbf{x}_i g_i \rangle \right] \\
&= \mathbb{E}_{\mathbf{x}} \mathbb{E}_g \frac{B_k}{n} \left\| \sum_{i=1}^n \mathbf{x}_i g_i \right\| \\
&\leq \mathbb{E}_{\mathbf{x}} \frac{B_k}{n} \sqrt{\mathbb{E}_g \left\| \sum_{i=1}^n \mathbf{x}_i g_i \right\|^2} \\
&= \mathbb{E}_{\mathbf{x}} \frac{B_k}{n} \sqrt{\sum_{i=1}^n \|\mathbf{x}_i\|^2} \\
&\leq \frac{B_k}{\sqrt{n}}
\end{aligned}$$

Hence, there exists a universal constant  $A > 0$  such that

$$R_n(F_{K,B}) \leq A \sum_k G_n(F_k) = A \frac{\sum_k B_k}{\sqrt{n}}$$

Finally, we apply Theorem 7 [1] where  $\phi$  is taken to be the hinge loss, and obtain the desired result.

## References

- [1] P. L. Bartlett and S. Mendelson. Rademacher and Gaussian complexities: Risk bounds and structural results. *J. Mach. Learn. Res.*, 3:463–482, Mar. 2003.
